# Supplementary material for: Retrospective for the Dynamic Sensorium Competition for predicting large-scale mouse primary visual cortex activity from videos
Source: PubMed Central journal article supplement — ArXiv. 2024 Jul 12:arXiv:2407.09100v1. Preprint. [Version 1] (PMC11261979), 2024-07-12
Supplement: NIHPP2407.09100V1-supplement-1.pdf [file NIHPP2407.09100V1-supplement-1.pdf]

## **A.6 Supplementary materials**

### **A.6.1 Dataset documentation and intended uses**

Dataset documentation is available at [https://gin.g-node.org/pollytur/sensorium\\_2023\\_dataset](https://gin.g-node.org/pollytur/sensorium_2023_dataset) (dataset structure) and in the whitepaper (Turishcheva et al., 2023) (data collection methodology). Intended usage examples (loading of the data and models training) are available here: [https://github.com/ecker-lab/sensorium\\_2023/tree/main/notebooks](https://github.com/ecker-lab/sensorium_2023/tree/main/notebooks).

### **A.6.2 URL for data download**

Five competition mice: [https://gin.g-node.org/pollytur/sensorium\\_2023\\_dataset](https://gin.g-node.org/pollytur/sensorium_2023_dataset)  
Five mice with ood responses [https://gin.g-node.org/pollytur/sensorium\\_2023\\_data/src/798ba8ad041d8f0f0ce879af396d52c7238c2730](https://gin.g-node.org/pollytur/sensorium_2023_data/src/798ba8ad041d8f0f0ce879af396d52c7238c2730).

### **A.6.3 Croissant url**

As the croissant library currently does not support the Video and List data types (<https://github.com/mlcommons/croissant/issues/690>), we generated the high-level meta file using kaggle interface: [https://github.com/ecker-lab/sensorium\\_2023/blob/croissant\\_file/sensorium-2023-metadata.json](https://github.com/ecker-lab/sensorium_2023/blob/croissant_file/sensorium-2023-metadata.json)

### **A.6.4 Author statement**

Author bear all responsibility in case of violation of rights. Both data and code are available under Creative Commons Attribution-NonCommercial-NoDerivatives 4.0 International License.

### **A.6.5 Hosting, licensing, and maintenance plan**

Following SENSORIUM 2022, data is hosted at <https://gin.g-node.org>, which is a publicly available platform, where data can be downloaded both via GUI or command line. The code is hosted in a public repository via <https://github.com>. The data does not need maintenance. Both data and code are available under Creative Commons Attribution-NonCommercial-NoDerivatives 4.0 International License. In case of any problems with the data hosting webpage, the authors have local copies of data and would re-release it.
